# Supplementary material
Source: Springer Nature journal article supplement (https://www.springermedizin.de/resource/supplementary/12889_2010_2692_MOESM1_ESM.pdf/9487100)

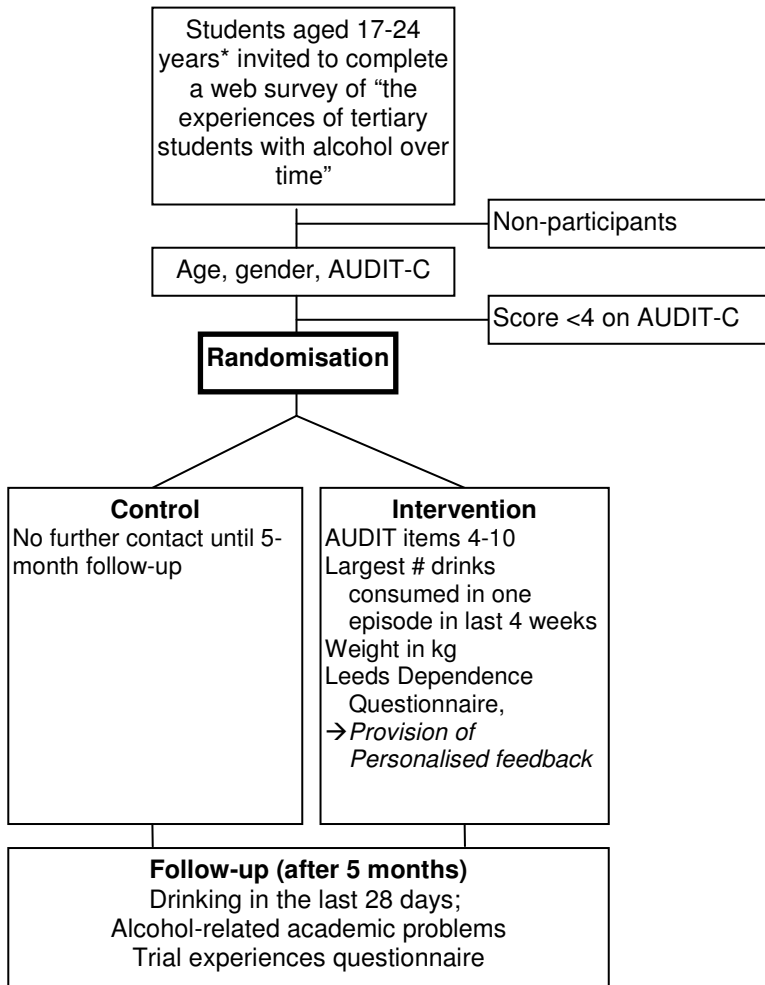

\*Sampling to be performed separately for Māori and non-Māori students

Supplement: MOESM1 [file 9487100]
